# Supplementary material for: Interspecific chloroplast genome sequence diversity and genomic resources in Diospyros
Source: PubMed Central journal article supplement (PMC6158880; doi:10.1186/s12870-018-1421-3), 2018-09-26

*trnH-psbA*

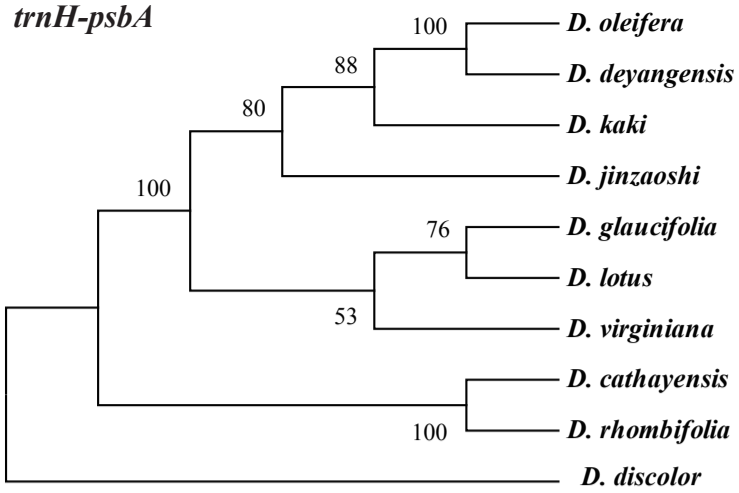

*rps16-trnQ*

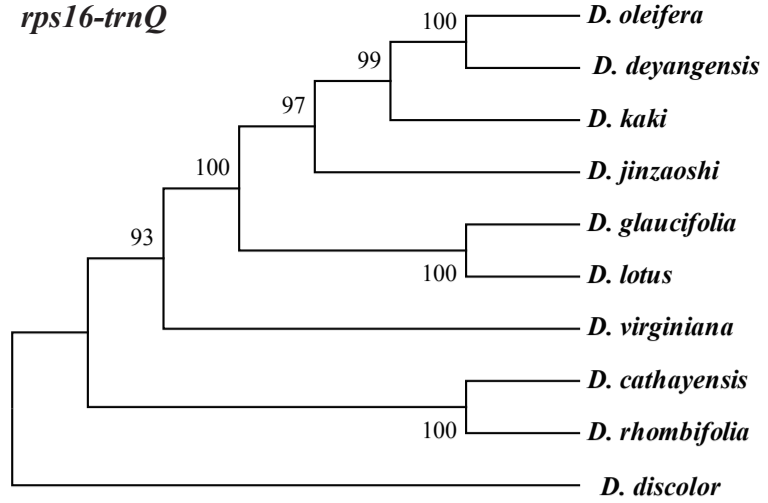

*rpoB-trnC*

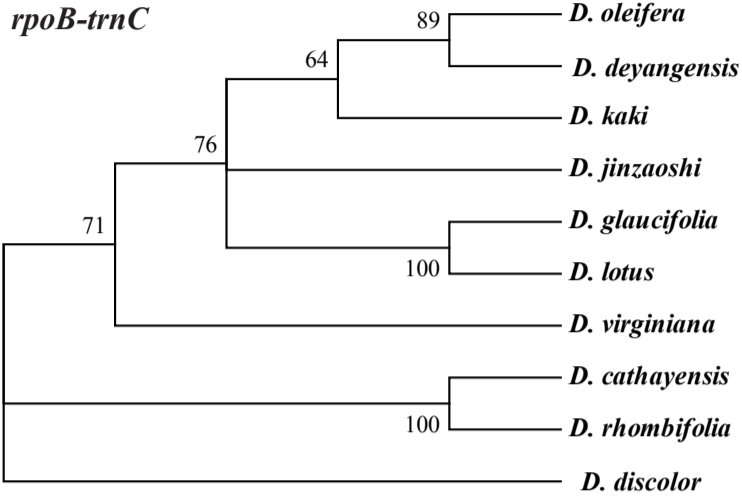

*rps4-trnT-trnL*

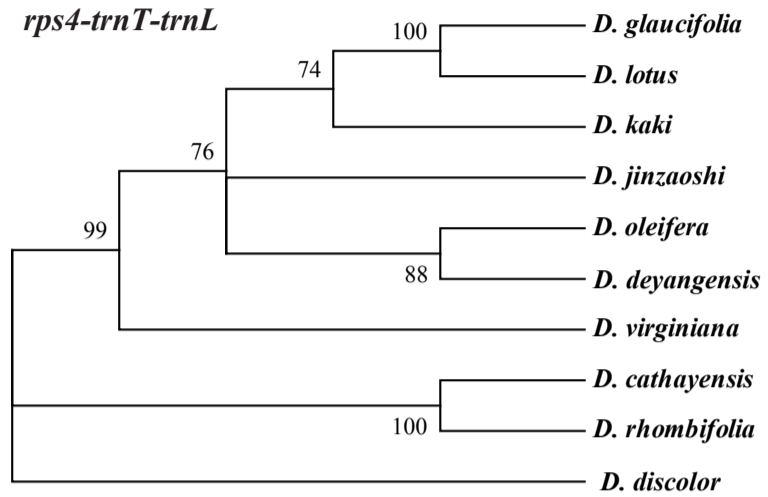

*ndhF*

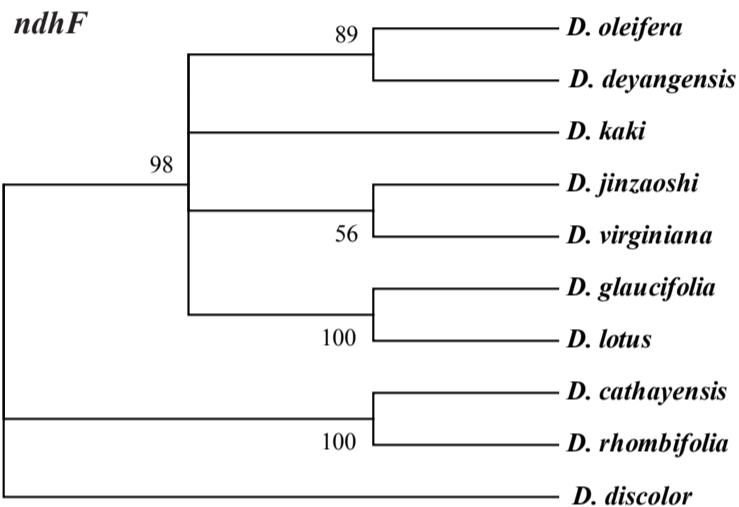

*ndhF-rpl32-trnL*

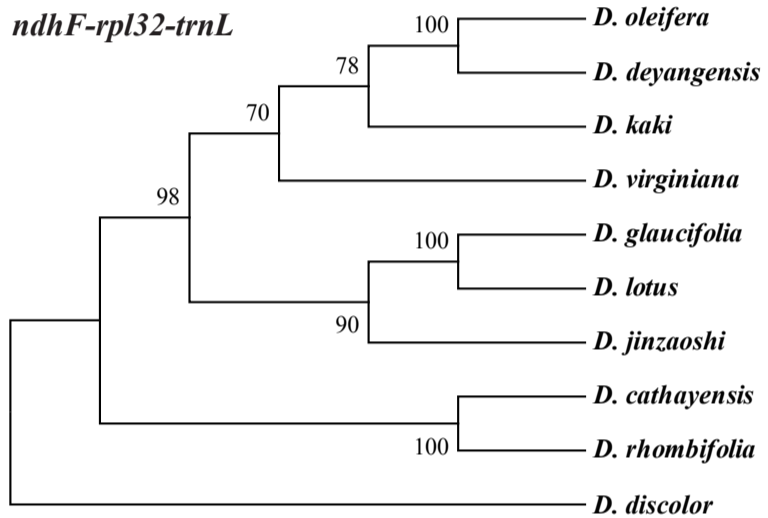

*ycf1a*

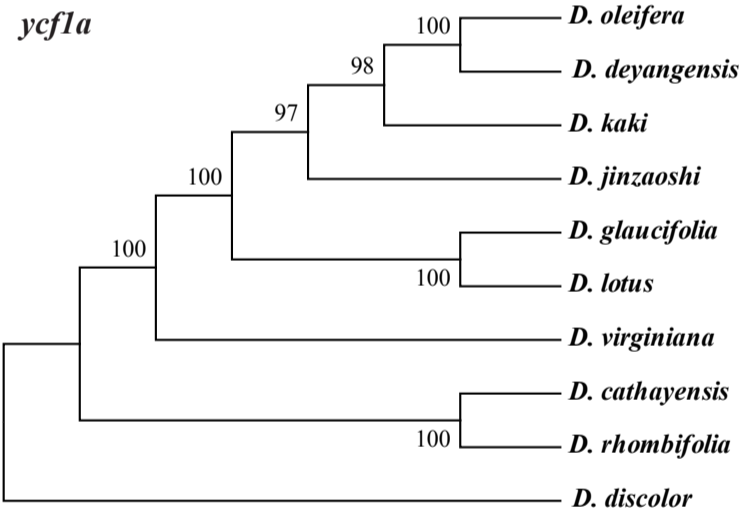

*ycf1b*

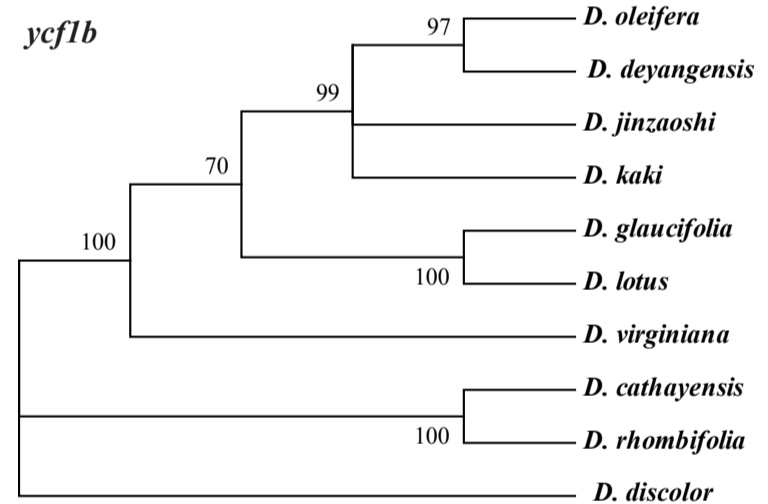

*matK*

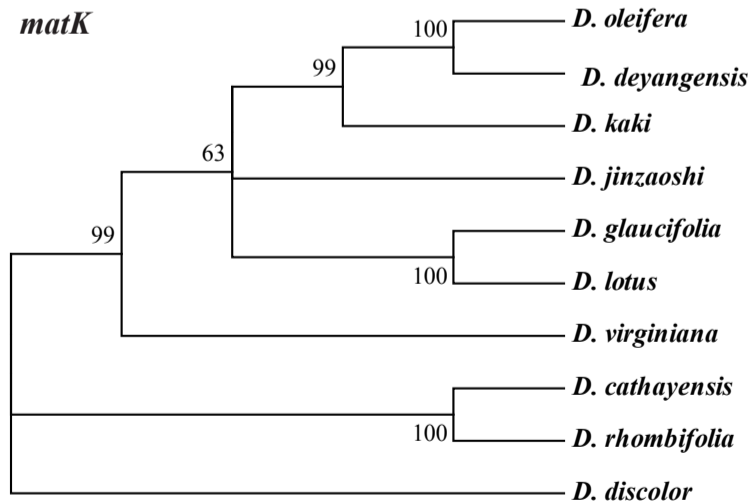

*rbcL*

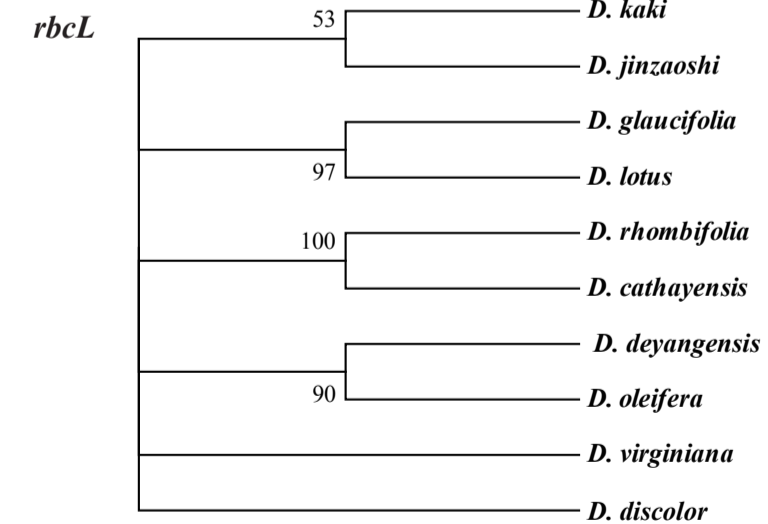

Supplement: 12870_2018_1421_MOESM1_ESM.pdf [file 12870_2018_1421_MOESM1_ESM.pdf]
